# Supplementary material for: HIF1α Regulates mTOR Signaling and Viability of Prostate Cancer Stem Cells
Source: Oxford University Press journal article supplement (doi:10.1158/1541-7786.mcr-14-0153-t), 2014-10-28
Supplement: 15417786mcr140153t-sup-128818_2_supp_2688848_ncyvrv.doc [file 15417786mcr140153t-sup-128818_2_supp_2688848_ncyvrv.doc]

**Supplementary Figure Legends.**

**Supplementary Figure 1. A)** We identified a Lin-/CD49f+/Sca-1+ basal prostate stem cell population in wild-type C57BL/6 mice (left). HIF-1α mRNA was upregulated in sorted basal murine prostate stem cells (n=5, right). **B)** Treatment with increasing concentration of HIF-1α inhibitor leads to a dose dependent HIF-1α protein downregulation in hypoxic TRAMP-C1 cells. HIF-1α protein levels were assessed by immunoprecipitation and western blotting. IgG heavy chain (HC) is shown as a loading control for immunoprecipitation.Quantified and normalized protein levels are shown. **C)** HIF-1α shRNA expression in the DU145 cell line (shHIF1A) leads to reduced mRNA levels of HIF-1α and reduced expression of its target gene REDD1.Scrambled shRNA (scrCo) served as control. **D)** Knockdown of HIF-1α mRNA in the TRAMP-C1 murine cancer cell line. Scrambled shRNA (scrCo) served as control.

**Supplementary Figure 2. A)** Analysis of basal prostate cancer stem cells in 5 different primary TRAMP tumors. We identified a distinct Lin-/CD49f+/Sca-1+ subpopulation in 19 (82,61%) of the 23 analyzed TRAMP mice. **B)** Quantified and normalized flow cytometry results of hypoxic CSC and non-CSC subpopulations of DU145 control (scrCo) and DU145 HIF1-α knockdown (shHIF1A) cells labeled with 7-AAD and Annexin V.

**Supplementary Figure 3.** Quantifications of western blot bands based on experiments described in detail in Figure 4. Ratio of phosphorylated to total protein amount is shown.

**Supplementary Figure 4. A)** Two male eight-week-old NSG mice were injected in two ventral subcutaneous sites with 1x106 scrambled shRNA (scrCo) transduced and wild-type (wt) DU145 cells, respectively. Tumor volumes were calculated regularly and weights at the time of sacrifice as well as growth curves are shown. Time in days is shown on the x-axis and error bars indicate standard error of the mean (SEM). **B)** Three male eight-week-old NSG mice were injected in four ventral subcutaneous sites with 1x105 sorted CSC and non CSC subpopulations of shHIF1A as well as sorted control (scrCo) DU145 cells, respectively. Tumor volumes were calculated regularly and the growth curves of the CSC and non CSC populations from shHIF1A and scrCo DU145 cell lines are shown. Time in days is shown on the x-axis and error bars indicate SEM. **C)** Photograph of the xenografts arising from the four cell subpopulations in a representative NSG mouse at the time of sacrifice.
