# Supplementary material for: HIF1α Regulates mTOR Signaling and Viability of Prostate Cancer Stem Cells
Source: Oxford University Press journal article supplement (doi:10.1158/1541-7786.mcr-14-0153-t), 2014-10-28
Supplement: 15417786mcr140153t-sup-128818_2_supp_2688849_ncyvrs.doc [file 15417786mcr140153t-sup-128818_2_supp_2688849_ncyvrs.doc]

**Supplementary Table 1.**

| **Antibodies used for FACS (pTR=primary TRAMP; TR=TRAMP-C1; DU=DU145)** | | | | |
| --- | --- | --- | --- | --- |
| **Antibody** | **Fluorochrome** | **Company** | **Dilution** | **Use** |
| Ter-119 | FITC | BioLegend | 1:250 | pTR |
| CD31 | FITC | BioLegend | 1:250 | pTR |
| CD45 | FITC | BioLegend | 1:250 | pTR |
| IgG2b | FITC | BioLegend | 3:250 | pTR |
| CD49f | PE | eBioscience | 1:200 | TR/DU |
| CD49f | PerCP-eFluor 710 | eBioscience | 1:333 | pTR |
| Rat IgG2a | PerCP-eFluor 710 | eBioscience | 1:333 | pTR |
| CD44 | FITC | eBioscience | 1:200 | DU |
| Sca-1 | PE/Cy7 | BioLegend | 1:100 | TR |
| Sca-1 | Pacific Blue | BioLegend | 1:1250 | pTR |
| Rat IgG1 | Pacific Blue | BioLegend | 1:1250 | pTR |
| Akt | - | Cell Signaling | 1:100 | pTR |
| S6 | - | Cell Signaling | 1:100 | pTR |
| pAkt | - | Cell Signaling | 1:100 | pTR |
| pS6 | - | Cell Signaling | 1:100 | pTR |
| Anti-rabbit IgG | AlexaFluor®647 | Invitrogen | 1:250 | pTR |
| LIVE/DEAD® | L-34959 | Invitrogen | 1:500 | pTR/TR/DU |

**Supplementary Table 2.**

| **Characteristics of analyzed TRAMP mice.** | |
| --- | --- |
| Mice sacrificed | 24 100,00% |
| Mean age (weeks) ± SD | 33,68 (± 6,23) |
| Mice with CSC population | 19 82,61% |
| Mean CSC population size (%, n=19, ± SD) | 2,97 (± 2,69) † |
| Not analyzed | 1 4,17% |

† The CSC population percentage was calculated from the total number of

viable Lin- cells.

**Supplementary Table 3.**

| **Target** | **Forward primer** | **Reverse primer** |
| --- | --- | --- |
| **human** | | |
| **NOTCH1** | GACAGCCTCAACGGGTACAA | ATACACGCGCCCTGGTTCAG |
| **NANOG** | ACCTCAGCTACAAACAGGTGA | CTTCTGCGTCACACCATTGC |
| **OCT3/4** | CAAAGCAGAAACCCTCGTGC | AACCACACTCGGACCACATC |
| **GLUT1** | CACTGTCGTGTCGCTGTTTG | GGACCCTGGCTGAAGAGTTC |
| **PDK1** | CCTGGACTTCGGATCAGTGAA | TGAACGGATGGTGTCCTGAG |
| **VEGFA** | TCACCATGCAGATTATGCGGA | ACGCGAGTCTGTGTTTTTGC |
| **REDD1** | AGCCAGTTGGTAAGCCAGG | GCCAGAGTCGTGAGTCCAG |
| **EPO** | CGAGAATATCACGACGGGCT | CGGCTTTATCCACATGCAGC |
| **18SRNA** | GTAACCCGTTGAACCCCA | CCATCCAATCGGTAGTAGCG |
| **murine** | | |
| **NOTCH1** | CAGTGCAACCCCCTGTATGA | AGTTGTTCCGTAGCTGGTCG |
| **NANOG** | GTGTGCACTCAAGGACAGGT | TGGTGCTGAGCCCTTCTGAATC |
| **OCT3/4** | CTGGGTGGATTCTCGAACCT | CTCTGAGCCTGGTCCGATTC |
| **GLUT1** | TTGGTTCCTTCTCTGTCGGC | TAAGCCAAACACCTGGGCAA |
| **PDK1** | CAGTTCCTGGACTTCGGGTC | TACGGATGGGGTCCTGAGAA |
| **VEGFA** | AATCCTGGAGCGTTCACTGT | ACGCGAGTCTGTGTTTTTGC |
| **REDD1** | GGGATCGTTTCTCGTCCTCC | AGGTATGAGGAGTCTTCCTCCG |
| **EPO** | ATGAAGACTTGCAGCGTGGA | TTCTGCACAACCCATCGTGA |
| **18SRNA** | GTAACCCGTTGAACCCCA | CCATCCAATCGGTAGTAGCG |
